# Supplementary material
Source: PubMed Central journal article supplement (PMC8483583)
Supplement: NIHMS1667945-supplement-1.pdf [file NIHMS1667945-supplement-1.pdf]

**Supplemental Table 1. Samples sizes at each time point based on assay type**

| Time Point | Assay Type                                      | Sample Size |
|------------|-------------------------------------------------|-------------|
| T0         | Cytokine Multiplex ELISA<br>(IL-6, IL-8, IL-10) | 66          |
| T12        | Cytokine Multiplex ELISA<br>(IL-6, IL-8, IL-10) | 36          |
|            | Tau ELISA                                       | 31          |
| T24        | Cytokine Multiplex ELISA<br>(IL-10)             | 83          |
|            | Tau ELISA                                       | 62          |
| T72        | Cytokine Multiplex ELISA<br>(IL-10)             | 80          |
|            | Tau ELISA                                       | 54          |
| T96        | Tau ELISA                                       | 43          |
|            | ELISA Duplex (BDNF/VEGF)                        | 63          |

**Supplemental Table 2. Median (IQR) values for each biomarker by MRI outcome group**

|                 | <b>Death (n=15)*</b>      | <b>Severe Brain Injury by MRI (n=19)*</b> | <b>Survived with normal/mild injury by MRI (n=69)</b> |
|-----------------|---------------------------|-------------------------------------------|-------------------------------------------------------|
| BDNF_0          | 216.44 (103.96 - 1006.15) | 172.24 (80.81 - 1006.52)                  | 359.28 (129.98 - 846.86)                              |
| BDNF_1          | 528.42 (252.65 - 776.09)  | 552.88 (183.15 - 3141.73)                 | 960.38 (409.02 - 2669)                                |
| BDNF_2          | 175.59 (114.23 - 1279.03) | 233.14 (64.38 - 2171.78)                  | 337.94 (134.1 - 636.48)                               |
| BDNF_3          | 365.21 (106.55 - 740.83)  | 262.29 (102.59 - 606.63)                  | 280.53 (70.22 - 619.32)                               |
| BDNF_4          | 179.15 (34.63 - 254.14)   | 111.34 (24.76 - 256.75)                   | 354.67 (147.88 - 965.57)                              |
| BDNF_early_Min  | 146.81 (57.53 - 576.31)   | 172.24 (24.76 - 233.14)                   | 187.44 (61.2 - 536.04)                                |
| BDNF_early_Max  | 286.06 (141.35 - 1279.03) | 923.96 (24.76 - 2171.78)                  | 622.43 (184.83 - 1459.75)                             |
| BDNF_early_avg  | 177.94 (121.22 - 576.31)  | 254.56 (24.76 - 988.84)                   | 360.68 (124.86 - 784.49)                              |
| BDNF_late_Min   | 106.55 (24.76 - 205.05)   | 111.34 (24.76 - 263.36)                   | 207.53 (56.71 - 499.81)                               |
| BDNF_late_Max   | 254.14 (24.76 - 616.79)   | 237.77 (102.59 - 315.64)                  | 494.24 (244.65 - 1131.68)                             |
| BDNF_late_Avg   | 164.56 (24.76 - 332.42)   | 111.34 (79.72 - 315.64)                   | 316.38 (121.99 - 605.46)                              |
| GFAP_0          | 0.14 (0.07 - 0.74)        | 0.78 (0.08 - 2.97)                        | 0.24 (0.02 - 0.75)                                    |
| GFAP_1          | 2.35 (0.9 - 3.81)         | 1.14 (0.31 - 1.24)                        | 0.31 (0.01 - 0.83)                                    |
| GFAP_2          | 1.09 (0.09 - 1.89)        | 0.48 (0.25 - 1.04)                        | 0.35 (0.01 - 2.45)                                    |
| GFAP_3          | 0.96 (0.51 - 1.55)        | 0.87 (0.43 - 1.47)                        | 0.53 (0.06 - 1.92)                                    |
| GFAP_4          | 0.42 (0.01 - 0.72)        | 1.01 (0.53 - 2.81)                        | 0.86 (0.21 - 2.26)                                    |
| GFAP_early_Min  | 0.11 (0.04 - 0.74)        | 0.29 (0.15 - 1.01)                        | 0.13 (0.01 - 0.73)                                    |
| GFAP_early_Max  | 0.4 (0.04 - 1.14)         | 0.7 (0.17 - 1.24)                         | 0.39 (0.01 - 2.45)                                    |
| GFAP_early_avg  | 0.22 (0.04 - 0.9)         | 0.45 (0.17 - 1.05)                        | 0.23 (0.01 - 1.23)                                    |
| GFAP_late_Min   | 0.06 (0.01 - 0.63)        | 0.87 (0.14 - 2.32)                        | 0.74 (0.08 - 1.69)                                    |
| GFAP_late_Max   | 0.63 (0.51 - 1.33)        | 1.04 (0.14 - 2.32)                        | 0.96 (0.14 - 2.21)                                    |
| GFAP_late_Avg   | 0.18 (0.1 - 0.63)         | 0.95 (0.14 - 2.32)                        | 0.79 (0.14 - 2.09)                                    |
| IL_10_0         | 53.5 (12.72 - 158.41)     | 110.37 (72.78 - 177.64)                   | 13.62 (5.16 - 84.2)                                   |
| IL_10_1         | 242.5 (200.64 - 326.4)    | 49.67 (3.03 - 143.95)                     | 3.11 (1.55 - 9.47)                                    |
| IL_10_2         | 11.1 (4 - 134.67)         | 7.57 (1.87 - 22.07)                       | 3.05 (0.52 - 7.63)                                    |
| IL_10_3         | 5.91 (2.37 - 67.79)       | 1.89 (0.43 - 4.32)                        | 0.73 (0.43 - 1.53)                                    |
| IL_10_4         | 3.25 (0.9 - 36.34)        | 0.51 (0.43 - 1.92)                        | 0.43 (0.43 - 1.4)                                     |
| IL_10_early_Min | 8.27 (1.49 - 65.16)       | 7.57 (1.87 - 59.45)                       | 3.23 (1.3 - 9.62)                                     |
| IL_10_early_Max | 23.11 (5.87 - 161.97)     | 59.45 (3.03 - 177.64)                     | 13.39 (5.79 - 54.44)                                  |
| IL_10_early_avg | 15.27 (1.59 - 91.77)      | 30.26 (2.12 - 61.5)                       | 6.81 (3.07 - 16.22)                                   |
| IL_10_late_Min  | 2.37 (0.82 - 5.9)         | 0.43 (0.43 - 2.22)                        | 0.43 (0.43 - 1.07)                                    |
| IL_10_late_Max  | 3.25 (0.9 - 5.91)         | 0.9 (0.43 - 4.32)                         | 1.05 (0.43 - 2.04)                                    |
| IL_10_late_Avg  | 3.25 (0.86 - 5.91)        | 0.51 (0.43 - 2.22)                        | 0.7 (0.43 - 1.5)                                      |
| IL_6_0          | 499.51 (12.34 - 1082.31)  | 113.69 (26.26 - 758)                      | 35.1 (10.41 - 201.61)                                 |
| IL_6_1          | 706.8 (365.87 - 758)      | 127.45 (28.15 - 583.88)                   | 30.36 (8.03 - 46.46)                                  |
| IL_6_2          | 28.41 (7.9 - 82.15)       | 36.32 (9.53 - 72.46)                      | 22.75 (10.13 - 73.95)                                 |
| IL_6_3          | 17 (13.48 - 250.96)       | 16.13 (9 - 20.84)                         | 7.54 (4.15 - 22.63)                                   |
| IL_6_4          | 16.15 (8.91 - 21.8)       | 7.03 (1.21 - 21.38)                       | 4.09 (2.07 - 8.84)                                    |

|                |                              |                            |                          |
|----------------|------------------------------|----------------------------|--------------------------|
| IL_6_early_Min | 29.9 (7.16 - 241.02)         | 26.24 (9.53 - 43.87)       | 20.87 (9.33 - 45.53)     |
| IL_6_early_Max | 105.65 (12.34 - 758)         | 41.06 (26.24 - 298.47)     | 43.71 (23.27 - 201.75)   |
| IL_6_early_avg | 54.06 (9.4 - 350.78)         | 26.26 (20.73 - 84.75)      | 29.8 (14.95 - 76.65)     |
| IL_6_late_Min  | 15.8 (2.05 - 21.8)           | 10.14 (1.21 - 20.84)       | 4.3 (2.07 - 8.84)        |
| IL_6_late_Max  | 17 (4.21 - 33.95)            | 16.46 (1.22 - 32.04)       | 8.6 (4.51 - 23.06)       |
| IL_6_late_Avg  | 16.15 (2.94 - 27.2)          | 13.54 (1.21 - 20.84)       | 5.83 (3.23 - 14.2)       |
| IL_8_0         | 324.83 (186.1 - 631)         | 631 (390.71 - 807.77)      | 151.4 (52.62 - 404.44)   |
| IL_8_1         | 1004.79 (473.09 - 2248.12)   | 315.96 (173.08 - 1226.14)  | 131.6 (66.32 - 372.84)   |
| IL_8_2         | 296.64 (117.13 - 631)        | 150.19 (81.65 - 635.98)    | 100.26 (48.63 - 281.02)  |
| IL_8_3         | 157.9 (38.6 - 631)           | 85.44 (45.57 - 267.68)     | 77.32 (40.78 - 206.72)   |
| IL_8_4         | 57.87 (30.28 - 606.37)       | 58.75 (34.51 - 99.88)      | 66.37 (40.66 - 110.39)   |
| IL_8_early_Min | 296.64 (117.13 - 525.42)     | 150.19 (81.65 - 454.06)    | 98.31 (48.98 - 201.92)   |
| IL_8_early_Max | 525.42 (201.18 - 631)        | 510.78 (150.19 - 1095.61)  | 262.27 (93.79 - 540.68)  |
| IL_8_early_avg | 469.7 (182.78 - 631)         | 273.04 (97.12 - 605.9)     | 160.98 (75.03 - 343.37)  |
| IL_8_late_Min  | 31.75 (29.86 - 163.38)       | 45.57 (30.93 - 91.73)      | 65.88 (31.34 - 110.39)   |
| IL_8_late_Max  | 41.75 (31.75 - 606.37)       | 51.55 (34.51 - 99.88)      | 102.35 (47.28 - 259.63)  |
| IL_8_late_Avg  | 35.56 (31.75 - 314.75)       | 45.57 (32.67 - 99.88)      | 86.27 (37.81 - 186.03)   |
| NRGN_0         | 0.06 (0.02 - 0.16)           | 0.05 (0.02 - 0.94)         | 0.04 (0.02 - 0.22)       |
| NRGN_1         | 0.92 (0.4 - 1.45)            | 0.46 (0.02 - 0.59)         | 0.08 (0.02 - 0.2)        |
| NRGN_2         | 0.16 (0.02 - 0.88)           | 0.31 (0.04 - 0.5)          | 0.1 (0.02 - 0.91)        |
| NRGN_3         | 0.54 (0.13 - 1.09)           | 0.37 (0.11 - 1.23)         | 0.19 (0.02 - 0.62)       |
| NRGN_4         | 0.02 (0.02 - 0.56)           | 0.6 (0.13 - 1.12)          | 0.34 (0.07 - 0.85)       |
| NRGN_early_Min | 0.02 (0.02 - 0.07)           | 0.05 (0.02 - 0.46)         | 0.02 (0.02 - 0.52)       |
| NRGN_early_Max | 0.05 (0.02 - 0.16)           | 0.21 (0.03 - 0.67)         | 0.18 (0.02 - 0.91)       |
| NRGN_early_avg | 0.03 (0.02 - 0.1)            | 0.09 (0.03 - 0.54)         | 0.06 (0.02 - 0.59)       |
| NRGN_late_Min  | 0.02 (0.02 - 0.02)           | 0.2 (0.04 - 1.03)          | 0.19 (0.02 - 0.62)       |
| NRGN_late_Max  | 0.13 (0.02 - 0.62)           | 0.27 (0.04 - 1.12)         | 0.33 (0.02 - 0.76)       |
| NRGN_late_Avg  | 0.05 (0.02 - 0.13)           | 0.23 (0.04 - 1.12)         | 0.23 (0.02 - 0.64)       |
| Tau_0          | 454.07 (84.43 - 17689.76)    | 708 (169.34 - 1313.84)     | 265.82 (126.43 - 524.59) |
| Tau_1          | 1184.25 (441.59 - 2161.08)   | 539.72 (371.54 - 800.16)   | 219.74 (109.98 - 435.41) |
| Tau_2          | 1989.6 (1410.2 - 5613.59)    | 527.45 (256.9 - 1515.02)   | 227.44 (140.43 - 518.7)  |
| Tau_3          | 2530.67 (2468.88 - 5097.23)  | 920.76 (552.23 - 1456.31)  | 273.81 (115.04 - 425.05) |
| Tau_4          | 7124.72 (2243.12 - 15037.18) | 1405.62 (737.26 - 1906.01) | 356.45 (128.09 - 629.64) |
| Tau_early_Min  | 810.5 (199.31 - 2062.49)     | 371.54 (209.14 - 555.34)   | 216 (109.69 - 356.74)    |
| Tau_early_Max  | 810.5 (199.31 - 2062.49)     | 541.6 (209.14 - 1865.42)   | 343.68 (153.35 - 549.65) |
| Tau_early_avg  | 810.5 (199.31 - 2062.49)     | 541.6 (209.14 - 1089.35)   | 285.03 (136.59 - 417.41) |
| Tau_late_Min   | 3813.95 (1675.61 - 12293.91) | 1772.84 (920.76 - 2873.24) | 316.29 (121.4 - 432.06)  |
| Tau_late_Max   | 3813.95 (2007.75 - 12293.91) | 1772.84 (920.76 - 2873.24) | 360.63 (176.38 - 496.14) |
| Tau_late_Avg   | 3813.95 (1817.24 - 12293.91) | 1772.84 (920.76 - 2873.24) | 344.25 (127.54 - 464.88) |
| VEGF_0         | 9.19 (0.91 - 16.01)          | 0.91 (0.91 - 3.72)         | 5.2 (0.91 - 40.34)       |
| VEGF_1         | 5.12 (2.17 - 23.75)          | 25.37 (0.91 - 54.07)       | 30.33 (5.27 - 112.17)    |
| VEGF_2         | 4.38 (0.91 - 64.21)          | 32.6 (5.41 - 105.31)       | 28.27 (7.79 - 131.64)    |
| VEGF_3         | 28.28 (17.59 - 60.17)        | 73.1 (22.85 - 96.29)       | 40.11 (12.82 - 111.91)   |

|                |                       |                       |                        |
|----------------|-----------------------|-----------------------|------------------------|
| VEGF_4         | 10.98 (5.02 - 26.28)  | 38.04 (34.83 - 50.7)  | 80.38 (31.6 - 213.94)  |
| VEGF_early_Min | 0.91 (0.91 - 40.71)   | 1.9 (0.91 - 49.83)    | 5.89 (0.91 - 38.66)    |
| VEGF_early_Max | 25 (2.53 - 78.22)     | 9.18 (1.9 - 144.48)   | 29.44 (7.8 - 185.43)   |
| VEGF_early_avg | 5.46 (1.52 - 77.09)   | 5.45 (1.84 - 86.34)   | 11.26 (5.29 - 55.27)   |
| VEGF_late_Min  | 5.02 (3.44 - 26.03)   | 35.55 (16.66 - 73.1)  | 31.94 (9.99 - 74.44)   |
| VEGF_late_Max  | 39.57 (5.02 - 122.02) | 47.27 (21.49 - 86.48) | 78.15 (27.04 - 186.54) |
| VEGF_late_Avg  | 13.28 (5.02 - 58.7)   | 37.95 (21.49 - 78.87) | 40.93 (19.09 - 111.91) |

**\*Columns for death and severe brain injury on MRI were combined as the adverse outcome in the primary analyses**

**Supplemental Table 3. Median (IQR) values for each biomarker by neurodevelopmental outcome group**

|                 | <b>Death (n=16)*</b>      | <b>Significant Neurodevelopmental Delay (n=11)*</b> | <b>Normal Neurodevelopmental Outcome (n=37)</b> |
|-----------------|---------------------------|-----------------------------------------------------|-------------------------------------------------|
| BDNF_0          | 286.06 (103.96 - 1006.15) | 120.11 (24.76 - 1592.09)                            | 359.28 (98.29 - 842.82)                         |
| BDNF_1          | 528.42 (252.65 - 776.09)  | 450.87 (70.22 - 2728.57)                            | 1170.08 (599.74 - 4055.06)                      |
| BDNF_2          | 212.95 (127.79 - 1060.3)  | 211.09 (116.17 - 598.88)                            | 337.94 (142.06 - 719.05)                        |
| BDNF_3          | 256.72 (24.76 - 740.83)   | 168.2 (24.76 - 937.84)                              | 276.91 (102.23 - 504.85)                        |
| BDNF_4          | 179.15 (34.63 - 254.14)   | 179.85 (24.76 - 562.18)                             | 346.33 (118.74 - 967.16)                        |
| BDNF_early_Min  | 157.96 (80.74 - 653.79)   | 37.96 (24.76 - 211.09)                              | 187.44 (67.54 - 401.16)                         |
| BDNF_early_Max  | 359.87 (144.08 - 1060.3)  | 923.96 (70.22 - 1808.5)                             | 528.71 (196.32 - 1870.15)                       |
| BDNF_early_avg  | 179.35 (134.02 - 680.4)   | 236.27 (35.04 - 411.37)                             | 360.68 (133.22 - 719.05)                        |
| BDNF_late_Min   | 70.59 (24.76 - 192.1)     | 74.66 (24.76 - 168.2)                               | 147.88 (87.79 - 426.15)                         |
| BDNF_late_Max   | 201.18 (24.76 - 491)      | 262.29 (102.96 - 646.66)                            | 470.63 (225.43 - 968.75)                        |
| BDNF_late_Avg   | 118.1 (24.76 - 303.03)    | 102.96 (79.72 - 283.46)                             | 269.99 (121.99 - 438.72)                        |
| GFAP_0          | 0.11 (0.05 - 0.74)        | 1.49 (0.01 - 2.98)                                  | 0.37 (0.1 - 1.73)                               |
| GFAP_1          | 2.35 (0.9 - 3.81)         | 0.83 (0.48 - 1.24)                                  | 0.33 (0.31 - 3.2)                               |
| GFAP_2          | 1.12 (0.27 - 2.78)        | 0.51 (0.01 - 0.83)                                  | 0.73 (0.24 - 3.29)                              |
| GFAP_3          | 0.6 (0.01 - 1.55)         | 0.84 (0.3 - 0.98)                                   | 0.92 (0.08 - 2.15)                              |
| GFAP_4          | 0.42 (0.01 - 0.72)        | 0.77 (0.21 - 1.04)                                  | 1.34 (0.4 - 2.93)                               |
| GFAP_4          | 0.42 (0.01 - 0.72)        | 0.77 (0.21 - 1.04)                                  | 1.34 (0.4 - 2.93)                               |
| GFAP_early_Min  | 0.08 (0.01 - 0.74)        | 0.31 (0.01 - 0.94)                                  | 0.31 (0.06 - 1.9)                               |
| GFAP_early_Max  | 0.67 (0.04 - 2.14)        | 0.5 (0.01 - 1.14)                                   | 1.01 (0.24 - 3.29)                              |
| GFAP_early_avg  | 0.17 (0.04 - 0.9)         | 0.37 (0.01 - 1.03)                                  | 0.54 (0.14 - 2.43)                              |
| GFAP_late_Min   | 0.04 (0.01 - 0.63)        | 0.62 (0.12 - 0.94)                                  | 1 (0.21 - 2.25)                                 |
| GFAP_late_Max   | 0.57 (0.01 - 1.33)        | 0.67 (0.12 - 1.07)                                  | 1.47 (0.42 - 2.64)                              |
| GFAP_late_Avg   | 0.14 (0.01 - 0.63)        | 0.64 (0.12 - 1)                                     | 1.18 (0.35 - 2.28)                              |
| IL_10_0         | 48.78 (12.72 - 158.41)    | 110.37 (14.5 - 119.75)                              | 41.6 (13.62 - 177.64)                           |
| IL_10_1         | 242.5 (200.64 - 326.4)    | 3.61 (2.4 - 5.96)                                   | 6.89 (2.76 - 30.05)                             |
| IL_10_2         | 9.68 (3.99 - 131.96)      | 2.9 (1.87 - 8.3)                                    | 4.02 (1.16 - 16.97)                             |
| IL_10_3         | 5.37 (0.82 - 67.79)       | 2.33 (0.43 - 3.08)                                  | 1.07 (0.53 - 1.52)                              |
| IL_10_4         | 3.25 (0.9 - 36.34)        | 1.83 (0.43 - 3.2)                                   | 0.6 (0.43 - 1.21)                               |
| IL_10_early_Min | 7.09 (2.73 - 44.13)       | 1.87 (0.43 - 8.3)                                   | 7.6 (1.55 - 24.76)                              |
| IL_10_early_Max | 25.77 (5.89 - 145.61)     | 14.5 (3.23 - 110.37)                                | 20.62 (10.54 - 177.64)                          |
| IL_10_early_avg | 12.95 (3.75 - 87.08)      | 3.85 (1.95 - 39.71)                                 | 12.2 (5.7 - 40.88)                              |
| IL_10_late_Min  | 2.3 (0.63 - 4.57)         | 0.43 (0.43 - 3.08)                                  | 0.43 (0.43 - 1.05)                              |
| IL_10_late_Max  | 2.81 (0.67 - 5.37)        | 1.92 (0.43 - 7.27)                                  | 1.2 (0.62 - 1.65)                               |
| IL_10_late_Avg  | 2.81 (0.65 - 4.6)         | 1.52 (0.43 - 3.52)                                  | 0.78 (0.48 - 1.3)                               |
| IL_6_0          | 241.02 (8.11 - 1082.31)   | 758 (22.7 - 2323.94)                                | 44.16 (20.56 - 201.61)                          |
| IL_6_1          | 706.8 (365.87 - 758)      | 33.38 (27.21 - 35.79)                               | 13.54 (8.03 - 92.92)                            |
| IL_6_2          | 28.04 (9.81 - 66.06)      | 26.24 (12.93 - 41.06)                               | 36.32 (13.34 - 73.95)                           |
| IL_6_3          | 16.4 (4.21 - 250.96)      | 20.84 (16.13 - 23.66)                               | 6.04 (4.3 - 22.84)                              |

|                |                              |                             |                           |
|----------------|------------------------------|-----------------------------|---------------------------|
| IL_6_4         | 16.15 (8.91 - 21.8)          | 6.32 (5.38 - 16.07)         | 3.66 (2.24 - 9.58)        |
| IL_6_early_Min | 29.15 (7.63 - 161.59)        | 12.93 (9.53 - 26.24)        | 27.17 (12.21 - 66.76)     |
| IL_6_early_Max | 67.77 (12.06 - 758)          | 35.79 (28.26 - 2323.94)     | 60.21 (25.97 - 173.02)    |
| IL_6_early_avg | 41.98 (9.59 - 324.48)        | 25.33 (20.73 - 222.67)      | 39.54 (25.97 - 104.98)    |
| IL_6_late_Min  | 12.35 (1.28 - 18.97)         | 7.03 (5.29 - 19.01)         | 3.71 (2.07 - 8.91)        |
| IL_6_late_Max  | 16.58 (2.36 - 27.41)         | 20.85 (8.07 - 32.04)        | 6.17 (4.26 - 22.63)       |
| IL_6_late_Avg  | 14.23 (1.73 - 22.68)         | 13.54 (7.03 - 20.42)        | 4.96 (3 - 14.2)           |
| IL_8_0         | 300.03 (111.69 - 631)        | 631 (510.78 - 699.07)       | 329.89 (117.09 - 486.22)  |
| IL_8_1         | 1004.79 (473.09 - 2248.12)   | 317.7 (102 - 1226.14)       | 311.02 (59.48 - 420.83)   |
| IL_8_2         | 249.9 (110.6 - 578.21)       | 145.96 (39.68 - 618.88)     | 226.8 (74.96 - 540.68)    |
| IL_8_3         | 99.83 (36.21 - 631)          | 148.36 (91.73 - 366.36)     | 81.39 (49.42 - 207.73)    |
| IL_8_4         | 57.87 (30.28 - 606.37)       | 97.73 (57.82 - 174.05)      | 66.04 (44.66 - 117.81)    |
| IL_8_early_Min | 254.74 (97.21 - 437.53)      | 97.28 (24.38 - 281.02)      | 118.33 (74.96 - 390.71)   |
| IL_8_early_Max | 478.85 (159.15 - 631)        | 635.98 (173.08 - 1226.14)   | 383.94 (219.85 - 776.34)  |
| IL_8_early_avg | 341.27 (149.95 - 596.75)     | 273.04 (82.88 - 518.82)     | 222.08 (113.54 - 486.22)  |
| IL_8_late_Min  | 31.02 (15.34 - 110.62)       | 88.09 (42.11 - 103.84)      | 65.71 (32.13 - 85.44)     |
| IL_8_late_Max  | 40.17 (16.29 - 382.14)       | 91.73 (42.11 - 366.36)      | 99.95 (51.55 - 242.18)    |
| IL_8_late_Avg  | 34.75 (16.29 - 205.17)       | 91.73 (42.11 - 237.49)      | 85.44 (43.47 - 183.47)    |
| NRGN_0         | 0.04 (0.02 - 0.16)           | 0.4 (0.02 - 2.06)           | 0.06 (0.02 - 0.79)        |
| NRGN_1         | 0.92 (0.4 - 1.45)            | 0.12 (0.09 - 0.59)          | 0.08 (0.02 - 1.41)        |
| NRGN_2         | 0.24 (0.02 - 0.96)           | 0.09 (0.04 - 0.31)          | 0.35 (0.03 - 1.13)        |
| NRGN_3         | 0.45 (0.02 - 1.09)           | 0.18 (0.06 - 0.73)          | 0.37 (0.02 - 0.77)        |
| NRGN_4         | 0.02 (0.02 - 0.56)           | 0.2 (0.08 - 0.59)           | 0.63 (0.15 - 1.03)        |
| NRGN_4         | 0.02 (0.02 - 0.56)           | 0.2 (0.08 - 0.59)           | 0.63 (0.15 - 1.03)        |
| NRGN_early_Min | 0.02 (0.02 - 0.07)           | 0.17 (0.03 - 0.36)          | 0.06 (0.02 - 0.79)        |
| NRGN_early_Max | 0.07 (0.02 - 0.74)           | 0.18 (0.03 - 0.55)          | 0.35 (0.02 - 1.13)        |
| NRGN_early_avg | 0.04 (0.02 - 0.13)           | 0.18 (0.03 - 0.44)          | 0.12 (0.02 - 0.94)        |
| NRGN_late_Min  | 0.02 (0.02 - 0.02)           | 0.15 (0.05 - 0.4)           | 0.49 (0.13 - 0.75)        |
| NRGN_late_Max  | 0.07 (0.02 - 0.62)           | 0.17 (0.05 - 0.43)          | 0.55 (0.21 - 1.02)        |
| NRGN_late_Avg  | 0.03 (0.02 - 0.13)           | 0.16 (0.05 - 0.41)          | 0.51 (0.17 - 0.84)        |
| Tau_0          | 454.07 (84.43 - 17689.76)    | 189.24 (141.22 - 532.15)    | 288.7 (106.94 - 1103.89)  |
| Tau_1          | 1184.25 (441.59 - 2161.08)   | 329.73 (282.3 - 585.85)     | 287.43 (119.71 - 520.12)  |
| Tau_2          | 1989.6 (1410.2 - 5613.59)    | 540.97 (256.9 - 1515.02)    | 429.35 (218.45 - 623.75)  |
| Tau_3          | 2530.67 (2468.88 - 5097.23)  | 552.23 (178.15 - 1456.31)   | 324.86 (160.29 - 441.81)  |
| Tau_4          | 7124.72 (2243.12 - 15037.18) | 1167.76 (822.29 - 1834.06)  | 484.36 (197.38 - 1277.04) |
| Tau_early_Min  | 810.5 (199.31 - 2062.49)     | 329.73 (233.56 - 548.16)    | 282.7 (134.46 - 541.6)    |
| Tau_early_Max  | 810.5 (199.31 - 2062.49)     | 414.44 (233.56 - 1185.09)   | 520.12 (227.44 - 745.54)  |
| Tau_early_avg  | 810.5 (199.31 - 2062.49)     | 414.44 (233.56 - 737.29)    | 386.42 (148.27 - 745.54)  |
| Tau_late_Min   | 3813.95 (1675.61 - 12293.91) | 1645.18 (1167.76 - 2273.56) | 395.2 (233.05 - 737.26)   |
| Tau_late_Max   | 3813.95 (2007.75 - 12293.91) | 1645.18 (1167.76 - 2273.56) | 434.81 (332.14 - 920.76)  |
| Tau_late_Avg   | 3813.95 (1817.24 - 12293.91) | 1645.18 (1167.76 - 2273.56) | 412.93 (255.6 - 920.76)   |
| VEGF_0         | 4.88 (0.91 - 16.01)          | 5.12 (0.91 - 5.54)          | 0.91 (0.91 - 5.78)        |
| VEGF_1         | 5.12 (2.17 - 23.75)          | 61.01 (7.8 - 83.58)         | 119.36 (2.19 - 218.91)    |

|                |                      |                       |                        |
|----------------|----------------------|-----------------------|------------------------|
| VEGF_2         | 6.31 (1.72 - 48.46)  | 32.6 (15.68 - 51.6)   | 28.27 (5.41 - 171.04)  |
| VEGF_3         | 24.82 (3.44 - 60.17) | 34.26 (22.85 - 84.59) | 52.95 (14.19 - 98.27)  |
| VEGF_4         | 10.98 (5.02 - 26.28) | 43.22 (30.93 - 96.08) | 81.05 (36.74 - 248.84) |
| VEGF_early_Min | 2.57 (0.91 - 28.36)  | 0.91 (0.91 - 49.83)   | 3.71 (0.91 - 11.74)    |
| VEGF_early_Max | 19.64 (5.39 - 59.46) | 32.6 (9.18 - 144.48)  | 12.98 (4.64 - 171.04)  |
| VEGF_early_avg | 6.65 (2.13 - 58.9)   | 9.18 (5.45 - 86.34)   | 6.46 (2.69 - 19.28)    |
| VEGF_late_Min  | 4.74 (2.89 - 18.51)  | 22.85 (16.66 - 47.27) | 33.37 (12.82 - 73.1)   |
| VEGF_late_Max  | 23.75 (3.67 - 91.09) | 47.27 (39.17 - 86.48) | 80.38 (36.74 - 120.9)  |
| VEGF_late_Avg  | 9.25 (3.67 - 42.2)   | 37.95 (27.51 - 60.17) | 38.13 (22.51 - 89.03)  |

**\*Columns for death and significant neurodevelopmental delay were combined as the adverse outcome in the primary analyses**
